# Supplementary material for: Analysis of the Myeloid-Derived Suppressor Cells and Annexin A1 in Multibacillary Leprosy and Reactional Episodes
Source: Research Square preprint supplement (doi:10.21203/rs.3.rs-126210/v1), 2020-12-16
Supplement: Supplementary file 1 [file 9ef7c6c41a192a9348a07ef8.docx]

**Supplementary Table 1. Data of leprosy patients: skin colour, sex, age, bacilary index, BCG scar and number of M-MDSC and G-MDSC.**

|  | Clinical | Skin colour | Sex | Age | BI | BCG | M-MDSC | G-MDSC |
| --- | --- | --- | --- | --- | --- | --- | --- | --- |
| 1 | TT | Brown | F | 18 to 29 | 1 | Y | - | - |
| 2 | Brown | F | 2 | Y | - | - |
| 3 | Caucasian | M | 1 | Y | - | - |
| 4 | Caucasian | F | 0 | N | - | - |
| 5 | Brown | F | 30 to 49 | 2 | Y | - | - |
| 6 | Brown | M | 1 | Y | - | - |
| 7 | Brown | F | 1 | Y | - | - |
| 8 | Caucasian | M | 0 | Y | - | - |
| 9 | Brown | F | 1 | N | - | - |
| 10 | Brown | F | 0 | N | - | - |
| 11 | Caucasian | F | 0 | Y | - | - |
| 12 | Brown | F | 2 | Y | - | - |
| 13 | Brown | M | 2 | N | - | - |
| 14 | Caucasian | F | 1 | N | - | - |
| 15 | Brown | F | 2 | N | - | - |
| 16 | Brown | F | 0 | Y | - | - |
| 17 | Caucasian | F | 1 | Y | - | - |
| 18 | Brown | M | 1 | N | - | - |
| 19 | Black | M | 2 | N | - | - |
| 20 | Black | F | 1 | N | - | - |
| 21 | Brown | M | 50 to 66 | 1 | Y | - | - |
| 22 | Black | F | 2 | Y | - | - |
| 23 | Brown | F | 0 | Y | - | - |
| 24 | Caucasian | F | 2 | Y | - | - |
| 25 | Caucasian | F | 1 | N | - | - |
| 26 | Caucasian | F | 1 | N | - | - |
| 27 | Brown | F | 0 | Y | - | - |
| 28 | Brown | F | 2 | Y | - | - |
| 29 | Brown | M | 1 | Y | - | - |
| 30 | Brown | F | 2 | Y | - | - |
| 31 | Brown | M | 2 | Y | - | - |
| 32 | Brown | F | 2 | N | - | - |
| 33 | Caucasian | F | 0 | Y | - | - |
| 34 | Black | F | 2 | N | - | - |
| 35 | Caucasian | M | 1 | Y | - | - |
| 36 | Brown | M | 0 | N | - | - |
| 37 | Brown | M | 2 | Y | - | - |
| 38 | Caucasian | F | 0 | Y | - | - |
| 39 | Black | M | 2 | N | - | - |
| 40 | Caucasian | F | 0 | Y | - | - |
| 1 | BB | Brown | F | 19 to 29 | 3 | Y | - | - |
| 2 | Brown | M | 3 | N | 1 | - |
| 3 | Brown | M | 3 | N | - | - |
| 4 | Brown | M | 3 | N | - | - |
| 5 | Black | F | 30 to 49 | 3 | N | - | - |
| 6 | Brown | M | 4 | Y | 1 | - |
| 7 | Black | F | 3 | N | - | - |
| 8 | Caucasian | F | 3 | N | - | - |
| 9 | Black | M | 3 | N | - | - |
| 10 | Black | F | 3 | Y | - | - |
| 11 | Brown | M | 3 | N | - | - |
| 12 | Brown | F | 3 | Y | - | - |
| 13 | Black | F | 3 | Y | - | - |
| 14 | Caucasian | F |  | 3 | N | - | - |
| 15 | Brown | F | 4 | Y | 2 | - |
| 16 | Brown | M | 3 | Y | - | - |
| 17 | Black | M | 3 | N | - | - |
| 18 | Black | M | 3 | N | - | - |
| 19 | Brown | M | 3 | N | - | - |
| 20 | Brown | F | 3 | Y | - | - |
| 21 | Black | M | 3 | N | - | - |
| 22 | Brown | F | 4 | N | 2 | - |
| 23 | Caucasian | F | 3 | Y | - | - |
| 24 | Brown | M | 3 | N | - | - |
| 25 | Caucasian | M | 3 | Y | - | - |
| 26 | Black | M | 50 to 67 | 4 | N | - | - |
| 27 | Black | M | 3 | N | - | - |
| 28 | Brown | F | 3 | N | - | - |
| 29 | Black | F | 3 | N | - | - |
| 30 | Brown | M | 3 | N | - | - |
| 31 | Brown | F | 3 | Y | - | - |
| 32 | Black | F | 3 | N | - | - |
| 33 | Brown | M | 3 | Y | 1 | - |
| 34 | Brown | F | 3 | Y | - | - |
| 35 | Brown | M | 3 | Y | - | - |
| 36 | Black | M | 3 | Y | - | - |
| 37 | Brown | M | 3 | Y | - | - |
| 38 | Brown | F | 3 | N | - | - |
| 39 | Caucasian | M | 3 | Y | - | - |
| 40 | Black | M | 3 | N | 1 | - |
| 1 | LL | Black | M | 18 to 29 | 5 | Y | 6 | 5 |
| 2 | Brown | M | 5 | N | 2 | 2 |
| 3 | Black | M | 6 | N | 10 | 7 |
| 4 | Black | M | 6 | Y | 7 | 6 |
| 5 | Brown | M | 6 | Y | 5 | 5 |
| 6 | Black | F | 30 to 49 | 5 | Y | 6 | 5 |
| 7 | Brown | F | 5 | Y | 3 | 3 |
| 8 | Brown | M | 5 | Y | 4 | 6 |
| 9 | Brown | F | 6 | N | 8 | 8 |
| 10 | Black | M | 6 | N | 7 | 6 |
| 11 | Caucasian | F | 5 | Y | 8 | 7 |
| 12 | Brown | M | 5 | N | 6 | 7 |
| 13 | Brown | M | 5 | N | 6 | 6 |
| 14 | Black | M | 6 | Y | 8 | 6 |
| 15 | Brown | M | 6 | Y | 2 | 1 |
| 16 | Brown | F | 5 | Y | 7 | 5 |
| 17 | Brown | F | 5 | Y | 9 | 7 |
| 18 | Brown | M | 6 | Y | 2 | 2 |
| 19 | Caucasian | M | 6 | N | 4 | 3 |
| 20 | Caucasian | F | 6 | N | 2 | 2 |
| 21 | Black | M | 6 | Y | 2 | 2 |
| 22 | Black | M | 50 to 66 | 5 | Y | 7 | 4 |
| 23 | Black | M | 5 | Y | 5 | 7 |
| 24 | Black | M | 5 | Y | 6 | 4 |
| 25 | Caucasian | M | 5 | N | 6 | 7 |
| 26 | Caucasian | M | 5 | N | 9 | 7 |
| 27 | Caucasian | M | 5 | N | 2 | 1 |
| 28 | Brown | F | 5 | N | 3 | 1 |
| 29 | Brown | M | 5 | N | 2 | 3 |
| 30 | Brown | F | 5 | Y | 2 | 2 |
| 31 | Brown | F | 5 | N | 4 | 2 |
| 32 | Black | F |  | 5 | Y | 4 | 5 |
| 33 | Black | F | 5 | N | 3 | 3 |
| 34 | Brown | F | 5 | N | 5 | 4 |
| 35 | Black | M | 6 | Y | 5 | 4 |
| 36 | Brown | M | 5 | Y | 3 | 3 |
| 37 | Black | M | 5 | N | 6 | 4 |
| 38 | Brown | M | 6 | Y | 4 | 3 |
| 39 | Black | M | 5 | N | 4 | 4 |
| 40 | Brown | M | 6 | Y | 6 | 6 |
| 1 | T1R | Brown | F | 18 to 29 | 3 | N | 7 | 1 |
| 2 | Caucasian | M | 4 | N | 6 | 4 |
| 3 | Brown | F | 30 to 49 | 3 | Y | 1 | 2 |
| 4 | Caucasian | M | 3 | N | 8 | 1 |
| 5 | Caucasian | M | 3 | N | 6 | 2 |
| 6 | Caucasian | F | 3 | N | 8 | 2 |
| 7 | Caucasian | F | 4 | Y | 2 | 1 |
| 8 | Black | M | 3 | Y | 3 | 1 |
| 9 | Brown | M | 4 | N | 4 | 5 |
| 10 | Brown | M | 3 | Y | 7 | 1 |
| 11 | Brown | M | 50 to 70 | 4 | N | 8 | 4 |
| 12 | Brown | M | 3 | Y | 6 | 4 |
| 13 | Brown | F | 4 | N | 6 | 5 |
| 14 | Brown | M | 4 | N | 7 | 2 |
| 15 | Black | M | 3 | N | 3 | 2 |
| 16 | Brown | M | 3 | N | 7 | 1 |
| 17 | Caucasian | M | 3 | N | 1 | 1 |
| 18 | Brown | F | 4 | Y | 2 | 2 |
| 19 | Black | M | 3 | N | 3 | 2 |
| 20 | Brown | M | 3 | N | 8 | 2 |
| 21 | Brown | F | 3 | Y | 4 | 1 |
| 22 | Brown | F | 4 | N | 2 | 1 |
| 23 | Caucasian | M | 4 | Y | 4 | 5 |
| 24 | Caucasian | M | 3 | N | 2 | 2 |
| 25 | Black | M | 3 | Y | 7 | 1 |
| 1 | T2R | Black | M | 18 to 29 | 4 | N | 7 | 7 |
| 2 | Brown | M | 4 | Y | 9 | 10 |
| 3 | Caucasian | M | 30 to 49 | 4 | N | 10 | 9 |
| 4 | Brown | M | 4 | N | 8 | 7 |
| 5 | Brown | F | 4 | Y | 10 | 9 |
| 6 | Black | M | 4 | N | 3 | 5 |
| 7 | Brown | F | 4 | Y | 8 | 7 |
| 8 | Brown | F | 4 | Y | 8 | 6 |
| 9 | Brown | M | 4 | N | 7 | 5 |
| 10 | Brown | M | 4 | Y | 4 | 3 |
| 11 | Brown | F | 5 | Y | 3 | 2 |
| 12 | Brown | F | 5 | N | 7 | 5 |
| 13 | Caucasian | M | 4 | Y | 5 | 5 |
| 14 | Brown | F | 4 | N | 3 | 5 |
| 15 | Brown | M | 4 | N | 7 | 5 |
| 16 | Brown | F | 50 to 69 | 5 | Y | 8 | 6 |
| 17 | Brown | M | 4 | N | 3 | 7 |
| 18 | Caucasian | M | 5 | N | 2 | 5 |
| 19 | Brown | M | 4 | Y | 7 | 7 |
| 20 | Brown | M | 5 | Y | 10 | 8 |
| 21 | Brown | F | 4 | Y | 6 | 5 |
| 22 | Caucasian | M | 6 | Y | 6 | 5 |
| 23 | Brown | F | 6 | N | 3 | 2 |
| 24 | Caucasian | M | 4 | Y | 3 | 2 |
| 25 | Black | M |  | 4 | N | 2 | 1 |
